# Supplementary material for: Genome-wide identification of the regulatory targets of a transcription factor using biochemical characterization and computational genomic analysis
Source: PubMed Central journal article supplement (PMC1326232; doi:10.1186/1471-2105-6-275), 2005-11-18

Figure S2

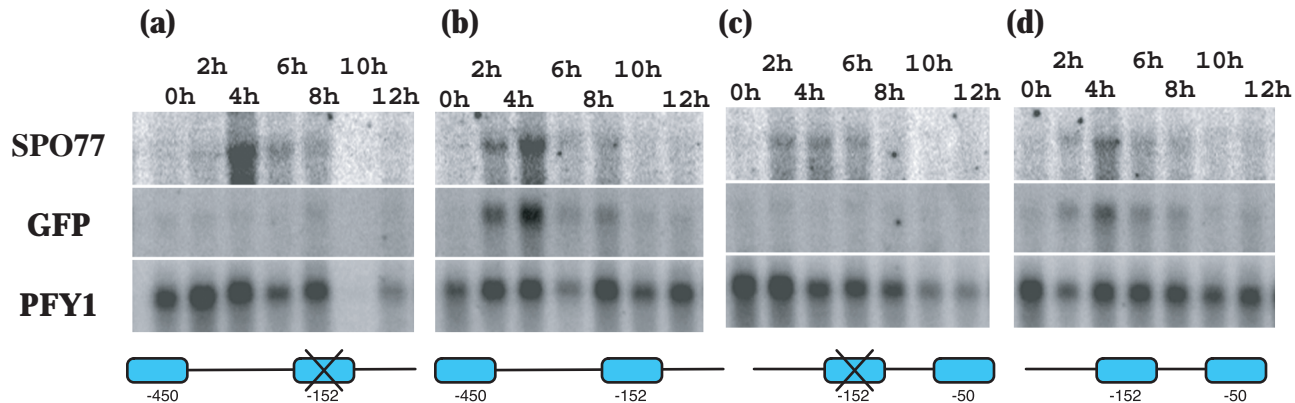

Supplement: 1471-2105-6-275-S3.pdf [file 1471-2105-6-275-S3.pdf]
